# Supplementary material for: Translational model of melphalan-induced gut toxicity reveals drug-host-microbe interactions that drive tissue injury and fever
Source: PubMed Central journal article supplement (PMC8236460; doi:10.1007/s00280-021-04273-7), 2021-04-20

Dose-finding (N=24)

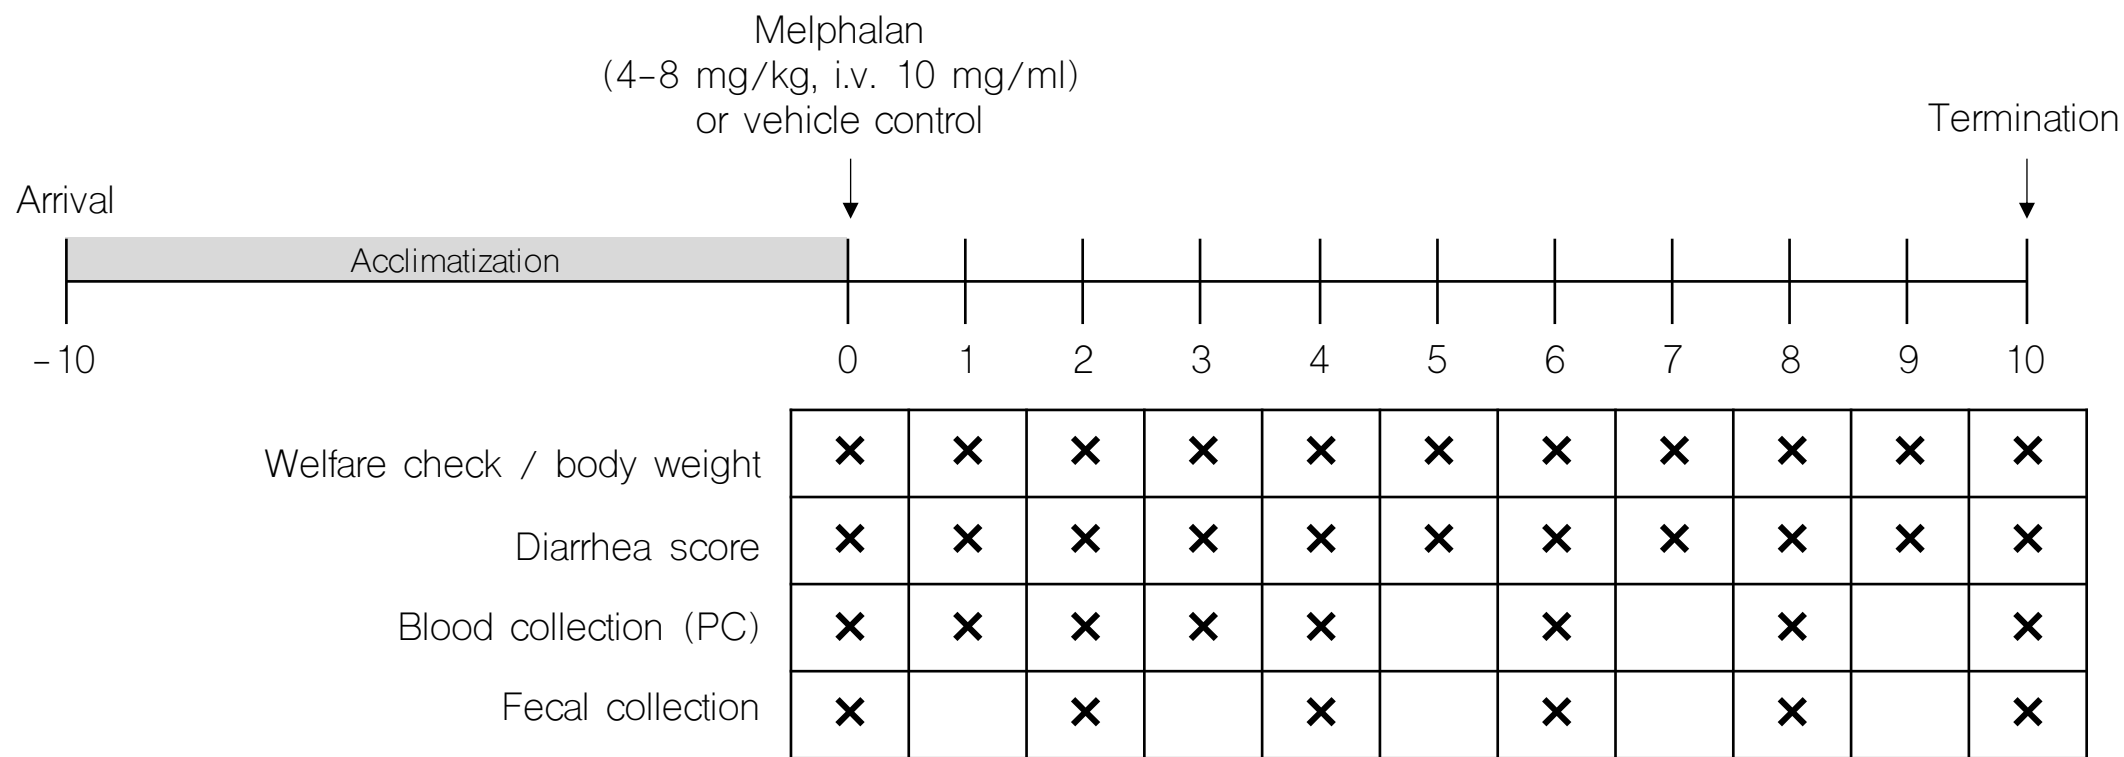

Dose validation (N=48)

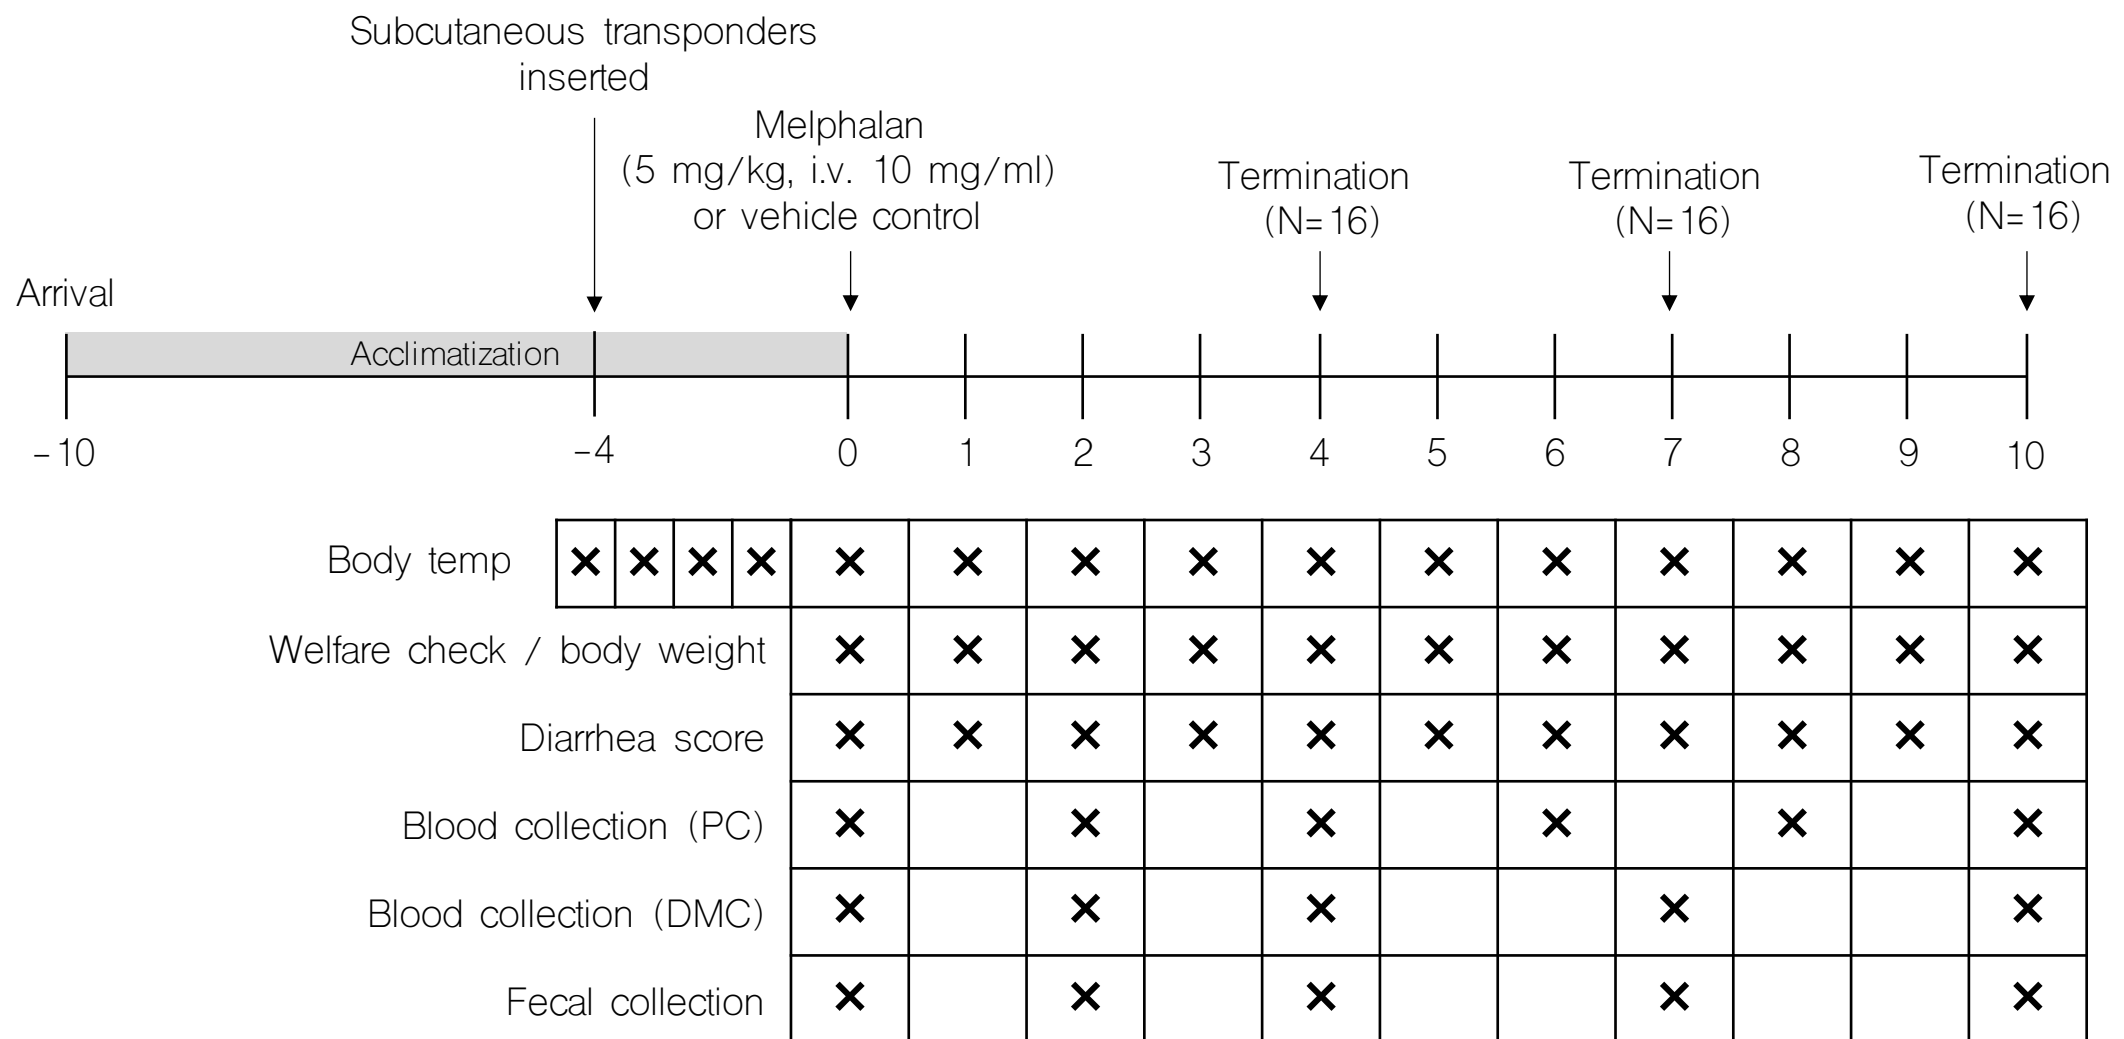

Supplement: 280_2021_4273_MOESM3_ESM.pdf [file 280_2021_4273_MOESM3_ESM.pdf]
